# Supplementary material for: Diagnosis of Myalgic Encephalomyelitis/Chronic Fatigue Syndrome With Partial Least Squares Discriminant Analysis: Relevance of Blood Extracellular Vesicles
Source: PubMed Central journal article supplement (PMC9011062; doi:10.3389/fmed.2022.842991), 2022-04-01
Supplement: Table_3.pdf [file Table_3.pdf]

**Supplementary Table S3.** Fifty top GO categories by gene targets of at least 2 DE discriminant miRNAs from PBMCs

| GO Subcategory                                                                                                            | P-adjusted | Q-value  | miRNAs/precursors                                |
|---------------------------------------------------------------------------------------------------------------------------|------------|----------|--------------------------------------------------|
| chemokine receptor binding                                                                                                | 1,59E-03   | 1,59E-03 | hsa-miR-223-3p, hsa-miR-146a-5p                  |
| cytokine receptor binding                                                                                                 | 1,59E-03   | 1,59E-03 | hsa-miR-590-5p, hsa-miR-223-3p, hsa-miR-146a-5p  |
| CCR5 chemokine receptor binding                                                                                           | 2,00E-03   | 2,00E-03 | hsa-miR-223-3p, hsa-miR-146a-5p                  |
| detection of biotic stimulus                                                                                              | 2,60E-03   | 2,60E-03 | hsa-miR-223-3p, hsa-miR-146a-5p                  |
| interferon-alpha production                                                                                               | 2,60E-03   | 2,60E-03 | hsa-miR-223-3p, hsa-miR-146a-5p                  |
| positive regulation of T-helper 2 cell cytokine production                                                                | 2,60E-03   | 2,60E-03 | hsa-miR-223-3p, hsa-miR-146a-5p                  |
| positive regulation of T cell mediated immunity                                                                           | 2,60E-03   | 2,60E-03 | hsa-miR-223-3p, hsa-miR-146a-5p                  |
| positive regulation of interferon-alpha production                                                                        | 2,60E-03   | 2,60E-03 | hsa-miR-223-3p, hsa-miR-146a-5p                  |
| positive regulation of neuroinflammatory response                                                                         | 2,60E-03   | 2,60E-03 | hsa-miR-223-3p, hsa-miR-146a-5p                  |
| positive regulation of type 2 immune response                                                                             | 2,60E-03   | 2,60E-03 | hsa-miR-223-3p, hsa-miR-146a-5p                  |
| signaling receptor activator activity                                                                                     | 3,97E-03   | 3,97E-03 | hsa-miR-223-3p, hsa-miR-146a-5p                  |
| transforming growth factor beta receptor cytoplasmic mediator activity                                                    | 3,97E-03   | 3,97E-03 | hsa-miR-106b-5p, hsa-miR-590-5p, hsa-miR-146a-5p |
| T-helper 2 cell cytokine production                                                                                       | 5,18E-03   | 5,18E-03 | hsa-miR-223-3p, hsa-miR-146a-5p                  |
| adaptive immune response                                                                                                  | 5,18E-03   | 5,18E-03 | hsa-miR-223-3p, hsa-miR-146a-5p                  |
| extracellular matrix assembly                                                                                             | 5,18E-03   | 5,18E-03 | hsa-miR-590-5p, hsa-miR-146a-5p                  |
| microglial cell activation                                                                                                | 5,18E-03   | 5,18E-03 | hsa-miR-223-3p, hsa-miR-146a-5p                  |
| monocyte chemotaxis                                                                                                       | 5,18E-03   | 5,18E-03 | hsa-miR-223-3p, hsa-miR-146a-5p                  |
| myeloid dendritic cell differentiation                                                                                    | 5,18E-03   | 5,18E-03 | hsa-miR-590-5p, hsa-miR-146a-5p                  |
| neural precursor cell proliferation                                                                                       | 5,18E-03   | 5,18E-03 | hsa-miR-590-5p, hsa-miR-223-3p, hsa-miR-146a-5p  |
| positive regulation of adaptive immune response                                                                           | 5,18E-03   | 5,18E-03 | hsa-miR-223-3p, hsa-miR-146a-5p                  |
| positive regulation of myeloid cell differentiation                                                                       | 5,18E-03   | 5,18E-03 | hsa-miR-590-5p, hsa-miR-223-3p, hsa-miR-146a-5p  |
| positive regulation of nitric-oxide synthase biosynthetic process                                                         | 5,18E-03   | 5,18E-03 | hsa-miR-223-3p, hsa-miR-146a-5p                  |
| regulation of macrophage activation                                                                                       | 5,18E-03   | 5,18E-03 | hsa-miR-223-3p, hsa-miR-146a-5p                  |
| regulation of neural precursor cell proliferation                                                                         | 5,18E-03   | 5,18E-03 | hsa-miR-590-5p, hsa-miR-223-3p, hsa-miR-146a-5p  |
| regulation of vascular endothelial growth factor production                                                               | 5,18E-03   | 5,18E-03 | hsa-miR-223-3p, hsa-miR-146a-5p                  |
| vascular endothelial growth factor production                                                                             | 5,18E-03   | 5,18E-03 | hsa-miR-223-3p, hsa-miR-146a-5p                  |
| Rho protein signal transduction                                                                                           | 5,84E-03   | 5,84E-03 | hsa-miR-223-3p, hsa-miR-146a-5p                  |
| adaptive immune response based on somatic recombination of immune receptors built from immunoglobulin superfamily domains | 5,84E-03   | 5,84E-03 | hsa-miR-223-3p, hsa-miR-146a-5p                  |
| inflammatory cell apoptotic process                                                                                       | 5,84E-03   | 5,84E-03 | hsa-miR-223-3p, hsa-miR-146a-5p                  |
| macrophage activation                                                                                                     | 5,84E-03   | 5,84E-03 | hsa-miR-223-3p, hsa-miR-146a-5p                  |
| neuroinflammatory response                                                                                                | 5,84E-03   | 5,84E-03 | hsa-miR-223-3p, hsa-miR-146a-5p                  |
| positive regulation of macrophage differentiation                                                                         | 5,84E-03   | 5,84E-03 | hsa-miR-590-5p, hsa-miR-146a-5p                  |
| positive regulation of vascular endothelial growth factor production                                                      | 5,84E-03   | 5,84E-03 | hsa-miR-223-3p, hsa-miR-146a-5p                  |
| regulation of T cell cytokine production                                                                                  | 5,84E-03   | 5,84E-03 | hsa-miR-223-3p, hsa-miR-146a-5p                  |
| regulation of adaptive immune response                                                                                    | 5,84E-03   | 5,84E-03 | hsa-miR-223-3p, hsa-miR-146a-5p                  |
| regulation of neuroinflammatory response                                                                                  | 5,84E-03   | 5,84E-03 | hsa-miR-223-3p, hsa-miR-146a-5p                  |
| signaling receptor activity                                                                                               | 6,93E-03   | 6,93E-03 | hsa-miR-223-3p, hsa-miR-146a-5p                  |
| cardiac chamber development                                                                                               | 7,08E-03   | 7,08E-03 | hsa-miR-590-5p, hsa-miR-223-3p, hsa-miR-146a-5p  |
| regulation of reactive oxygen species metabolic process                                                                   | 7,08E-03   | 7,08E-03 | hsa-miR-590-5p, hsa-miR-223-3p, hsa-miR-146a-5p  |
| positive regulation of T cell cytokine production                                                                         | 7,33E-03   | 7,33E-03 | hsa-miR-223-3p, hsa-miR-146a-5p                  |
| positive regulation of glial cell differentiation                                                                         | 7,33E-03   | 7,33E-03 | hsa-miR-223-3p, hsa-miR-146a-5p                  |
| regulation of extracellular matrix assembly                                                                               | 7,33E-03   | 7,33E-03 | hsa-miR-590-5p, hsa-miR-146a-5p                  |
| response to immobilization stress                                                                                         | 7,33E-03   | 7,33E-03 | hsa-miR-590-5p, hsa-miR-223-3p                   |

**Supplementary Table S3.** Fifty top GO categories by gene targets of at least 2 DE discriminant miRNAs from PBMCs

|                                                                                                                   |          |          |                                                 |
|-------------------------------------------------------------------------------------------------------------------|----------|----------|-------------------------------------------------|
| cytokine activity                                                                                                 | 7,90E-03 | 7,90E-03 | hsa-miR-223-3p, hsa-miR-146a-5p                 |
| T cell cytokine production                                                                                        | 9,25E-03 | 9,25E-03 | hsa-miR-223-3p, hsa-miR-146a-5p                 |
| regulation of bone resorption                                                                                     | 9,25E-03 | 9,25E-03 | hsa-miR-223-3p, hsa-miR-146a-5p                 |
| regulation of glial cell differentiation                                                                          | 9,25E-03 | 9,25E-03 | hsa-miR-223-3p, hsa-miR-146a-5p                 |
| response to xenobiotic stimulus                                                                                   | 9,25E-03 | 9,25E-03 | hsa-miR-223-3p, hsa-miR-146a-5p                 |
| defense response to virus                                                                                         | 1,20E-02 | 1,20E-02 | hsa-miR-106b-5p, hsa-miR-146a-5p                |
| heart valve development                                                                                           | 1,33E-02 | 1,33E-02 | hsa-miR-590-5p, hsa-miR-223-3p, hsa-miR-146a-5p |
| regulation of carbohydrate metabolic process by<br>regulation of transcription from RNA polymerase II<br>promoter | 1,44E-02 | 1,44E-02 | hsa-miR-106b-5p, hsa-miR-223-3p                 |
